# Supplementary material for: Complete Recovery of Acanthamoeba Motility among Surviving Organisms after Contact Lens Care Disinfection
Source: MDPI journal article supplement (doi:10.3390/microorganisms11020299), 2023-01-23
Supplement: s1 [file s1]

**Supplementary Materials:** The following supporting information can be downloaded at: [www.mdpi.com/xxx/s1](http://www.mdpi.com/xxx/s1). **Video S1.** Example timelapse video of *Acanthamoeba* movement in experimental conditions during hour 18 (last hour of AC6 recovery), to demonstrate the differences in movement and possible recovery of amoebae after disinfection. Scale bar = 10mm. White arrows indicate remaining moving amoebae. Example calculations (using the representative videos in this figure) demonstrating the difference in using the average total distance moved in a frame vs. the relative units of net number of microns moved:

One-quarter Ringer's solution:

Moving amoebae: 409

Average total distance of each amoeba: 457  $\mu\text{m}$

409 amoebae  $\times$  457  $\mu\text{m}$  = 186,913  $\mu\text{m}$  net microns moved by amoebae in the field of view over one hour

PAPB/PQ:

Moving amoebae: 33

Average total distance of each amoeba: 197  $\mu\text{m}$

33 amoebae  $\times$  197  $\mu\text{m}$  = 6,501  $\mu\text{m}$  net microns moved by amoebae in the field of view over one hour

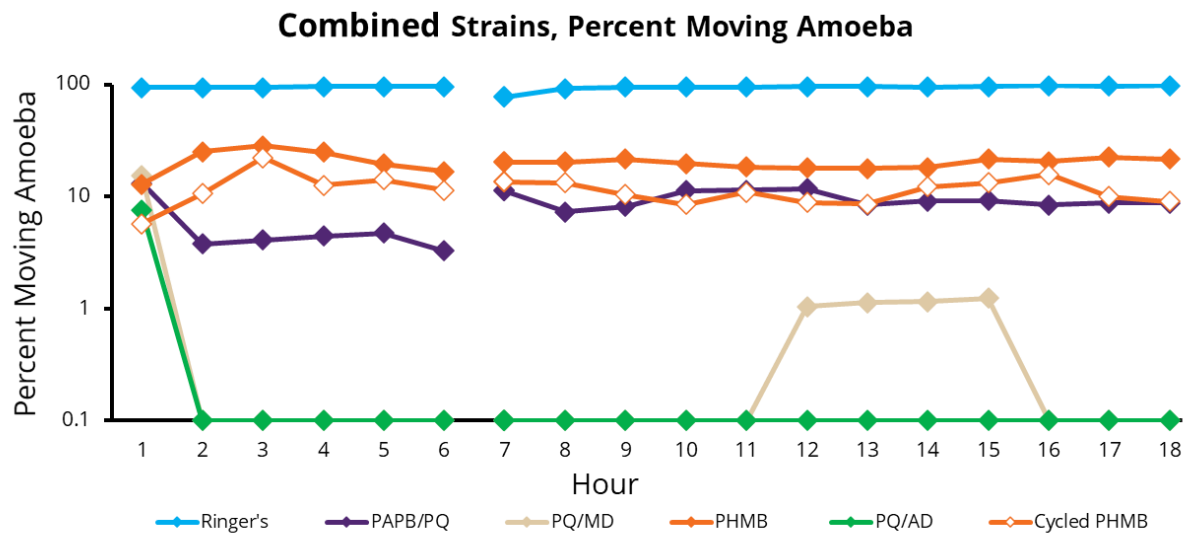

**Figure S1.** Percentage of amoebae which are moving in any one field of view, with both strains combined. Amoebae were disinfected or put in one-quarter Ringer's solution for the first 6 h, followed by AC6 media for the following 12 h (total 18 h). Shown in log scale to visualize differences between conditions.  $n = 3/\text{group}/\text{strain}$ .

**A**

| Total Distance |          |          |          |          |          |
|----------------|----------|----------|----------|----------|----------|
| 50370          | CLC      |          |          | AC6      |          |
| Hour           | 1        | 3        | 6        | 12       | 18       |
| Ringer's       | 172182.1 | 143914.7 | 149368.3 | 140863.5 | 135344.6 |
| PHMB           | 9402.6   | 36382.8  | 22693.2  | 49843.7  | 73428.4  |
| Cycled PHMB    | 1129.2   | 39336.4  | 32226.1  | 44716.0  | 43024.0  |
| PAPB/PQ        | 213.2    | 425.1    | 1689.2   | 7972.8   | 7824.5   |
| PQ/MD          | 607.9    | 0.0      | 0.0      | 933.2    | 367.3    |
| PQ/AD          | 138.4    | 0.0      | 0.0      | 0.0      | 0.0      |

**B**

| Total Distance |          |          |          |         |         |
|----------------|----------|----------|----------|---------|---------|
| 30461          | CLC      |          |          | AC6     |         |
| Hour           | 1        | 3        | 6        | 12      | 18      |
| Ringer's       | 156380.5 | 140067.0 | 119209.2 | 98284.6 | 92958.2 |
| PHMB           | 38924.3  | 51017.6  | 18116.2  | 26131.0 | 20736.1 |
| Cycled PHMB    | 50081.2  | 91675.0  | 30811.4  | 9112.2  | 8384.0  |
| PAPB/PQ        | 17124.9  | 1722.9   | 166.8    | 8001.7  | 1598.4  |
| PQ/MD          | 17667.4  | 0.0      | 0.0      | 121.9   | 167.7   |
| PQ/AD          | 5771.6   | 0.0      | 0.0      | 0.0     | 0.0     |

**C**

| Speed       |      |      |      |      |      |
|-------------|------|------|------|------|------|
| 50370       | CLC  |      |      | AC6  |      |
| Hour        | 1    | 3    | 6    | 12   | 18   |
| Ringer's    | 47.9 | 40.2 | 41.7 | 39.4 | 45.2 |
| PHMB        | 2.6  | 10.2 | 6.3  | 13.9 | 20.5 |
| Cycled PHMB | 0.3  | 11.0 | 9.0  | 12.5 | 12.0 |
| PAPB/PQ     | 0.0  | 0.1  | 0.5  | 2.2  | 2.2  |
| PQ/MD       | 0.2  | 0.0  | 0.0  | 0.3  | 0.1  |
| PQ/AD       | 0.0  | 0.0  | 0.0  | 0.0  | 0.0  |

**D**

| Speed       |      |      |      |      |      |
|-------------|------|------|------|------|------|
| 30461       | CLC  |      |      | AC6  |      |
| Hour        | 1    | 3    | 6    | 12   | 18   |
| Ringer's    | 43.5 | 39.1 | 33.3 | 27.4 | 24.1 |
| PHMB        | 10.8 | 14.3 | 5.1  | 7.3  | 5.8  |
| Cycled PHMB | 13.9 | 25.6 | 8.6  | 2.6  | 2.3  |
| PAPB/PQ     | 4.8  | 0.5  | 0.1  | 2.2  | 0.4  |
| PQ/MD       | 4.9  | 0.0  | 0.0  | 0.0  | 0.1  |
| PQ/AD       | 1.6  | 0.0  | 0.0  | 0.0  | 0.0  |

**Figure S2.** Data tables summarizing numerical findings at key time points, from Figures 4 and 6. Amoebae were disinfected or put in one-quarter Ringer's solution for the first 6 h, followed by AC6 media for the following 12 h (total 18 h). (**A,B**) Normalized total distance is presented as mean  $\mu\text{m}$  traveled per hour, multiplied by the number of moving amoebae per field of view. (**C,D**) Speed is presented as mean  $\mu\text{m}$  per second, multiplied by the number of moving amoebae per field of view (relative units).  $n = 3/\text{group}$ . Relevant standard error and statistical comparisons presented in Figures 4 and 6.
